# Supplementary material for: Physicochemical Characterization and Biological Properties of Pine Honey Produced across Greece
Source: MDPI journal article supplement (doi:10.3390/foods11070943), 2022-03-25
Supplement: s1 [file s1]

**Table S1.** Full data of each honey sample tested in this study

| Honey No.   | Reference number | Geographical location | Organoleptic | Moisture % | pH   | Free Acidity (meq/kg) | Electrical conductivity (mS/cm) | Colour ( mm Pfund) | HMF (mg/kg) | Diacetase activity (DN) | Fructose (%) | Glucose (%) | Fructose + Glucose (%) | Fructose / Glucose | HDE / P | PG/10g | H <sub>2</sub> O <sub>2</sub> (μM) | Total protein content (μg/g) | TPC (mgGAE/kg) | DPH (RSA%) | FRAP (mmol Fe+2/kg) |
|-------------|------------------|-----------------------|--------------|------------|------|-----------------------|---------------------------------|--------------------|-------------|-------------------------|--------------|-------------|------------------------|--------------------|---------|--------|------------------------------------|------------------------------|----------------|------------|---------------------|
| 1           | 8                | Corinthia             | 3            | 16.5       | 4.7  | 22                    | 0.95                            | 67                 | 1.79        | 22.94                   | 30.9         | 26.6        | 57.5                   | 1.16               | 17.30   | 27129  | 2430                               | 445.70                       | 380.14         | 42.43      | 3.26                |
| 2           | 13               | Corinthia             | 3            | 15.7       | 4.8  | 23                    | 1.00                            | 76                 | 0.37        | 34.68                   | 31.4         | 27.5        | 58.9                   | 1.14               | 11.29   | 39636  | 2467                               | 527.34                       | 296.40         | 44.44      | 1.87                |
| 3           | 20               | Evia                  | 3            | 15.5       | 4.8  | 26                    | 0.91                            | 93                 | 0.59        | 25.26                   | 32.1         | 27.6        | 59.7                   | 1.16               | 3.07    | 55244  | 4703                               | 655.65                       | 422.07         | 53.51      | 2.52                |
| 4           | 26               | Evia                  | 3            | 15.6       | 4.8  | 23                    | 0.94                            | 60                 | 0.29        | 19.98                   | 31.8         | 29.2        | 61                     | 1.09               | 1.23    | 93471  | 3118                               | 540.71                       | 387.23         | 55.15      | 4.73                |
| 5           | 30               | Evia                  | 3            | 15.5       | 4.8  | 22                    | 0.93                            | 64                 | 0.78        | 16.52                   | 32.2         | 29.4        | 61.6                   | 1.10               | 1.24    | 53024  | 2737                               | 463.66                       | 523.18         | 56.21      | 3.04                |
| 6           | 50               | Rhodes                | 2            | 18         | 4    | 26                    | 1.22                            | 88                 | 1.12        | 14.28                   | 29.3         | 23.9        | 53.2                   | 1.22               | 37.31   | 10260  | 2285                               | 515.89                       | 411.76         | 54.79      | 4.45                |
| 7           | 64               | Rhodes                | 3            | 16.2       | 4.5  | 29                    | 1.27                            | 95                 | 4.42        | 9.34                    | 32.6         | 29.3        | 61.9                   | 1.11               | 3.29    | 27283  | 2664                               | 664.09                       | 510.94         | 62.64      | 4.29                |
| 8           | 65               | Evia                  | 2            | 15.5       | 4.8  | 29                    | 1.18                            | 116                | 0.22        | 19.74                   | 39.2         | 30.5        | 69.8                   | 1.28               | 2.68    | 32949  | 4459                               | 628.70                       | 693.32         | 62.17      | 9.43                |
| 9           | 74               | Thassos               | 2            | 15.9       | 5    | 24                    | 1.30                            | 115                | 0.00        | 26.51                   | 30.6         | 27.7        | 58.3                   | 1.10               | 3.16    | 74234  | 3499                               | 572.05                       | 431.05         | 55.31      | 4.75                |
| 10          | 79               | Evia                  | 2            | 16.2       | 4.9  | 26                    | 1.06                            | 116                | 0.89        | 17.91                   | 31.45        | 27.02       | 58.5                   | 1.16               | 10.73   | 9150   | 3892                               | 412.93                       | 633.21         | 62.37      | 9.16                |
| 11          | 82               | Chania                | 1            | 14.5       | 4.6  | 26                    | 1.00                            | 93                 | 3.29        | 8.19                    | 34.5         | 22.3        | 56.8                   | 1.55               | 0.13    | 223195 | 3220                               | 465.29                       | 382.16         | 64.69      | 4.13                |
| 12          | 83               | Chania                | 3            | 14         | 5    | 18                    | 1.26                            | 99                 | 1.04        | 6.95                    | 32.9         | 20.1        | 53                     | 1.64               | 9.00    | 11838  | 2903                               | 368.30                       | 277.07         | 53.15      | 3.05                |
| 13          | 88               | Thassos               | 3            | 16         | 4.7  | 24                    | 1.17                            | 87                 | 0.00        | 33.43                   | 29.5         | 24.1        | 53.6                   | 1.22               | 0.16    | 232443 | 2952                               | 722.94                       | 340.14         | 55.12      | 3.71                |
| 14          | 91               | Thassos               | 2            | 17         | 4.7  | 24                    | 1.30                            | 104                | 1.27        | 18.57                   | 32.5         | 31.8        | 64.3                   | 1.02               | 1.20    | 55490  | 1911                               | 486.12                       | 340.36         | 48.19      | 3.56                |
| 15          | 93               | Thassos               | 3            | 16         | 4.8  | 24                    | 1.19                            | 103                | 0.15        | 26.46                   | 32.3         | 25.9        | 58.2                   | 1.25               | 3.10    | 33758  | 3290                               | 611.67                       | 424.42         | 67.14      | 5.73                |
| 16          | 95               | Chalkidiki            | 3            | 14.9       | 4.9  | 30                    | 1.14                            | 118                | 0.44        | 36.11                   | 25.9         | 20.6        | 46.4                   | 1.26               | 11.28   | 23148  | 4049                               | 652.80                       | 488.78         | 70.21      | 4.81                |
| 17          | 96               | Thassos               | 3            | 15.5       | 4.6  | 28                    | 1.06                            | 100                | 0.44        | 27.86                   | 35.5         | 29.5        | 65.1                   | 1.20               | 1.16    | 90009  | 3847                               | 632.94                       | 641.94         | 65.38      | 6.88                |
| 18          | 99               | Thassos               | 3            | 16.5       | 4.8  | 24                    | 1.03                            | 90                 | 0.00        | 24.65                   | 33.9         | 27.9        | 61.8                   | 1.22               | 1.69    | 30123  | 5620                               | 563.61                       | 362.29         | 65.23      | 5.73                |
| 19          | 100              | Chalkidiki            | 3            | 15.6       | 4.8  | 28                    | 0.99                            | 99                 | 1.57        | 37.29                   | 29.5         | 22.7        | 52.2                   | 1.30               | 83.78   | 36500  | 3908                               | 726.56                       | 376.47         | 50.84      | 4.77                |
| 20          | 101              | Thassos               | 3            | 16.4       | 4.9  | 22                    | 1.09                            | 95                 | 1.42        | 20.68                   | 31.8         | 25.5        | 57.3                   | 1.25               | 1.26    | 59683  | 3559                               | 606.18                       | 363.21         | 60.24      | 4.96                |
| 21          | 105              | Thassos               | 3            | 18.2       | 4.5  | 24                    | 1.13                            | 83                 | 2.43        | 17.46                   | 34.9         | 33.2        | 68.1                   | 1.05               | 0.40    | 56230  | 2394                               | 538.79                       | 329.31         | 62.79      | 4.12                |
| 22          | 109              | Evia                  | 2            | 16.5       | 5    | 24                    | 1.36                            | 78                 | 0.00        | 7.71                    | 32.9         | 31.8        | 64.7                   | 1.03               | 0.99    | 22566  | 3316                               | 301.47                       | 450.68         | 65.70      | 4.27                |
| 23          | 111              | Evia                  | 1            | 17.5       | 4.9  | 18                    | 0.98                            | 67                 | 0.00        | 8.96                    | 31.8         | 25.5        | 57.3                   | 1.25               | 4.55    | 15902  | 3064                               | 310.79                       | 327.16         | 50.95      | 3.94                |
| 24          | 112              | Thassos               | 3            | 16         | 4.7  | 26                    | 1.17                            | 90                 | 0.00        | 26.59                   | 30.2         | 21.4        | 51.7                   | 1.41               | 0.77    | 88195  | 4945                               | 695.04                       | 558.04         | 72.45      | 5.63                |
| 25          | 116              | Thassos               | 3            | 16.3       | 4.9  | 22                    | 1.00                            | 89                 | 4.15        | 17.41                   | 31.5         | 24.2        | 55.7                   | 1.30               | 0.39    | 95166  | 2482                               | 502.18                       | 618.56         | 79.33      | 6.30                |
| 26          | 136              | Chalkidiki            | 3            | 18.1       | 4.7  | 38                    | 1.09                            | 96                 | 0.00        | 23.57                   | 26.3         | 20.7        | 47.0                   | 1.27               | 2.01    | 60889  | 2246                               | 475.55                       | 580.19         | 65.08      | 5.33                |
| 27          | 151              | Chania                | 3            | 15.6       | 4.6  | 38                    | 1.23                            | 101                | 0.46        | 15.44                   | 31.3         | 14.4        | 45.7                   | 2.17               | 8.93    | 4994   | 4252                               | 827.53                       | 637.28         | 77.49      | 8.23                |
| <b>Mean</b> |                  |                       | 2.63         | 16.1       | 4.7  | 25.5                  | 1.11                            | 91.9               | 1.00        | 20.90                   | 31.81        | 25.94       | 57.75                  | 1.26               | 8.23    | 57871  | 3341                               | 552.39                       | 451.38         | 60.11      | 4.91                |
| <b>SD</b>   |                  |                       | 0.63         | 1.0        | 0.20 | 4.6                   | 0.13                            | 15.9               | 1.25        | 8.71                    | 2.64         | 4.30        | 6.15                   | 0.23               | 16.98   | 55867  | 921                                | 127.78                       | 120.38         | 9.21       | 1.85                |
| <b>Min</b>  |                  |                       | 1            | 14.0       | 4.0  | 18                    | 0.91                            | 60                 | 0           | 6.95                    | 25.9         | 14.4        | 45.7                   | 1.02               | 0.13    | 4994   | 1911                               | 301.47                       | 277.07         | 42.43      | 1.87                |
| <b>Max</b>  |                  |                       | 3            | 18.2       | 5.0  | 38                    | 1.36                            | 118                | 4.42        | 37.29                   | 39.2         | 33.2        | 69.8                   | 2.17               | 83.78   | 232443 | 5620                               | 827.53                       | 693.32         | 79.33      | 9.43                |

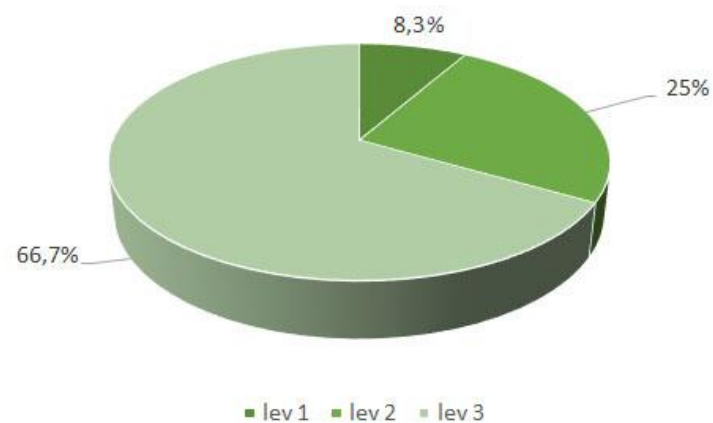

**Figure S1.** Sensory three-point scale evaluation of pine honey samples.

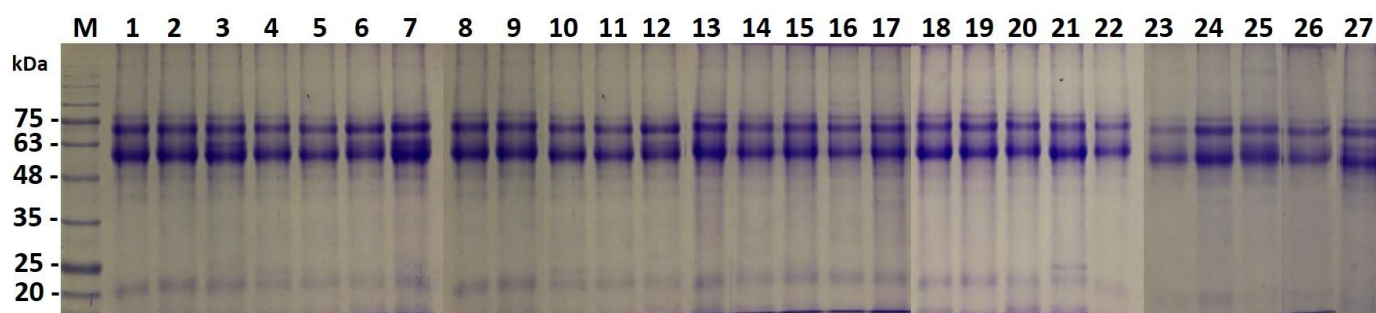

**Figure S2.** Protein profile of pine honeydew honey samples (n=27) from Greece. A 15  $\mu$ l of diluted honey samples (50% w/w in distilled water) were separated by 12% SDS-PAGE gels and protein content assessed after gel staining with Coomassie Brilliant Blue R-250. M, protein pre-stained marker.

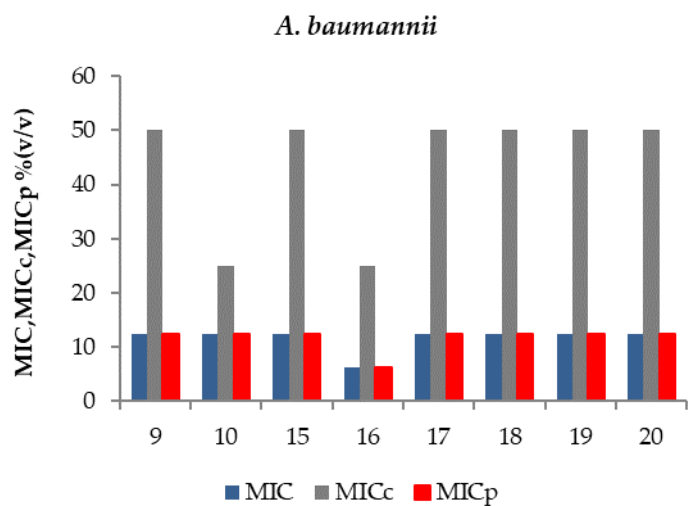

(a)

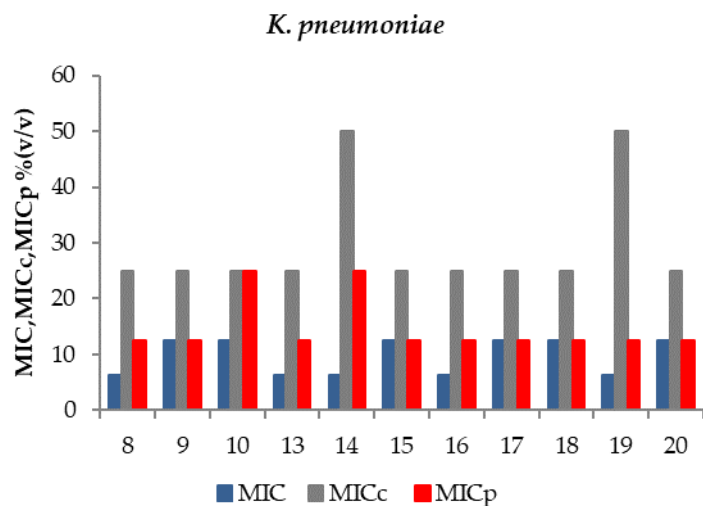

(b)

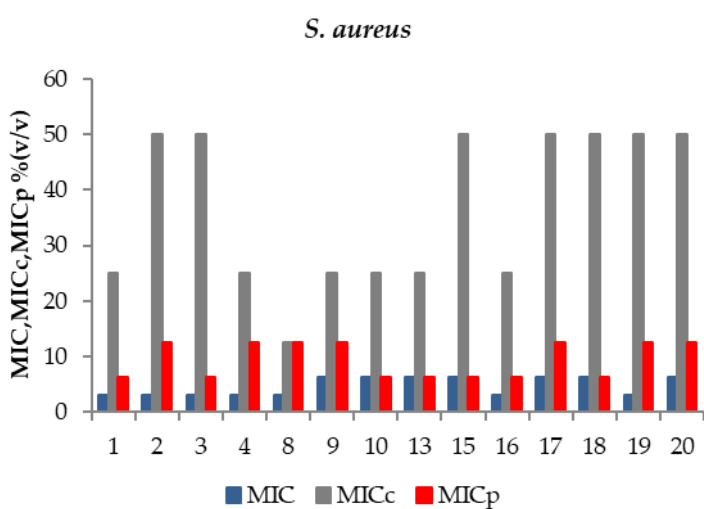

(c)

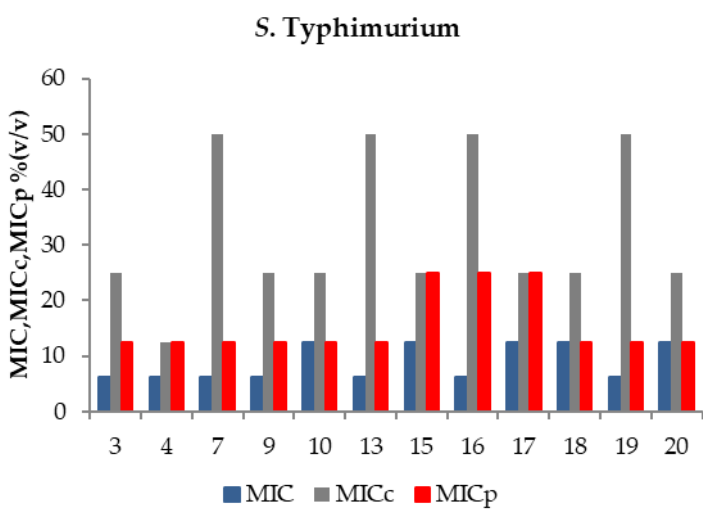

(d)

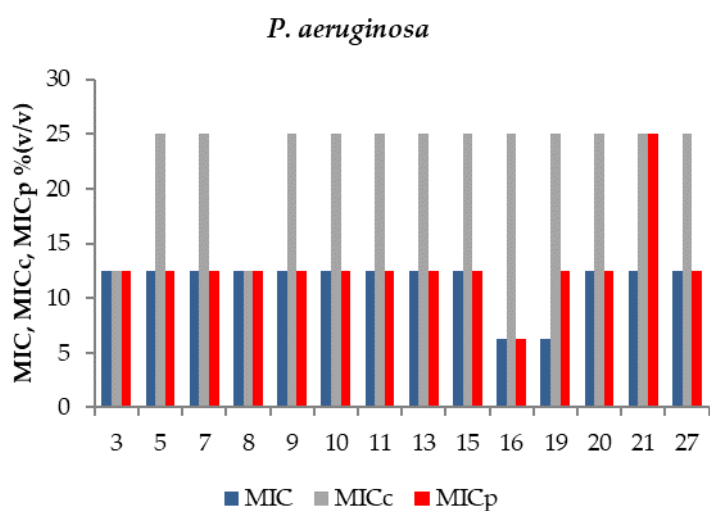

(e)

**Figure S3.** MIC values after proteinase K (MICp) and bovine catalase (MICc) treatment of honey samples tested against *A. baumannii* (a), *K. pneumoniae* (b), *S. aureus* (c), *S. typhimurium* (d) and *P. aeruginosa* (e). MIC values are expressed as %v/v).

**Table S2.** Correlation coefficient (r, first value) and significance (second value) of physicochemical parameters of pine honey calculated by Spearman's correlation analysis.

|                               | Moisture (%) | pH      | Free Acidity (meq/kg) | Electrical Conductivity (mS/cm) | Colour (mm Pfund) | HMF (mg/kg) | Diastase (DN) | Fructose (%) | Glucose (%) | Fru + Glu (%) | Fru / Glu | HDE / P  | PG / 10gr | H <sub>2</sub> O <sub>2</sub> (μM) | Protein (μg/g) | TPC (mg GAE/kg) | DPPH (RSA%) | FRAP (nmol Fe <sup>2+</sup> /kg) |
|-------------------------------|--------------|---------|-----------------------|---------------------------------|-------------------|-------------|---------------|--------------|-------------|---------------|-----------|----------|-----------|------------------------------------|----------------|-----------------|-------------|----------------------------------|
| Moisture                      | 1.000        | -0.182  | -0.167                | 0.158                           | -0.295            | -0.039      | -0.169        | -0.144       | 0.210       | 0.108         | -0.338    | -0.056   | -0.102    | -0.471*                            | -0.306         | -0.202          | -0.049      | 0.011                            |
|                               | -            | 0.364   | 0.404                 | 0.432                           | 0.136             | 0.845       | 0.398         | 0.473        | 0.293       | 0.591         | 0.085     | 0.782    | 0.612     | 0.013                              | 0.120          | 0.312           | 0.809       | 0.955                            |
| pH                            | -0.182       | 1.000   | -0.447*               | -0.027                          | 0.126             | -0.298      | 0.013         | -0.047       | -0.033      | -0.044        | 0.013     | 0.146    | -0.163    | 0.282                              | -0.329         | -0.085          | -0.047      | 0.018                            |
|                               | 0.364        | -       | 0.019                 | 0.893                           | 0.533             | 0.131       | 0.947         | 0.817        | 0.871       | 0.828         | 0.948     | 0.467    | 0.418     | 0.155                              | 0.094          | 0.673           | 0.816       | 0.930                            |
| Free Acidity                  | -0.167       | -0.447* | 1.000                 | 0.268                           | 0.577**           | -0.051      | 0.241         | -0.159       | -0.168      | -0.149        | 0.250     | 0.118    | -0.088    | 0.346                              | 0.556**        | 0.592**         | 0.410*      | 0.493**                          |
|                               | 0.404        | 0.019   | -                     | 0.177                           | 0.002             | 0.802       | 0.225         | 0.428        | 0.403       | 0.458         | 0.209     | 0.558    | 0.662     | 0.077                              | 0.003          | 0.001           | 0.034       | 0.009                            |
| Electrical Conductivity       | 0.158        | -0.027  | 0.268                 | 1.000                           | 0.482*            | -0.147      | -0.204        | 0.058        | 0.017       | 0.003         | -0.022    | -0.021   | -0.240    | -0.062                             | 0.113          | 0.112           | 0.255       | 0.204                            |
|                               | 0.432        | 0.893   | 0.177                 | -                               | 0.011             | 0.465       | 0.308         | 0.773        | 0.931       | 0.989         | 0.914     | 0.917    | 0.228     | 0.757                              | 0.573          | 0.579           | 0.199       | 0.308                            |
| Colour                        | -0.295       | 0.126   | 0.577**               | 0.482*                          | 1.000             | 0.009       | 0.224         | -0.005       | -0.175      | -0.129        | 0.313     | 0.225    | -0.173    | 0.381*                             | 0.339          | 0.399*          | 0.271       | 0.547**                          |
|                               | 0.136        | 0.533   | 0.002                 | 0.011                           | -                 | 0.963       | 0.262         | 0.979        | 0.381       | 0.521         | 0.111     | 0.259    | 0.388     | 0.050                              | 0.084          | 0.039           | 0.172       | 0.003                            |
| HMF                           | -0.039       | -0.298  | -0.051                | -0.147                          | 0.009             | 1.000       | -0.323        | 0.168        | 0.008       | 0.033         | 0.017     | 0.088    | -0.026    | -0.349                             | -0.063         | -0.075          | -0.149      | -0.164                           |
|                               | 0.845        | 0.131   | 0.802                 | 0.465                           | 0.963             | -           | 0.100         | 0.402        | 0.967       | 0.872         | 0.933     | 0.662    | 0.896     | 0.074                              | 0.757          | 0.710           | 0.459       | 0.415                            |
| Diastase                      | -0.169       | 0.013   | 0.241                 | -0.204                          | 0.224             | -0.323      | 1.000         | -0.425*      | -0.077      | -0.134        | 0.006     | 0.128    | 0.357     | 0.320                              | 0.590**        | 0.013           | -0.047      | 0.145                            |
|                               | 0.398        | 0.947   | 0.225                 | 0.308                           | 0.262             | 0.100       | -             | 0.027        | 0.702       | 0.505         | 0.975     | 0.526    | 0.068     | 0.104                              | 0.001          | 0.949           | 0.816       | 0.471                            |
| Fructose                      | -0.144       | -0.047  | -0.159                | 0.058                           | -0.005            | 0.168       | -0.425*       | 1.000        | 0.621**     | 0.754**       | -0.204    | -0.422*  | 0.045     | 0.082                              | -0.209         | -0.035          | 0.105       | -0.008                           |
|                               | 0.473        | 0.817   | 0.428                 | 0.773                           | 0.979             | 0.402       | 0.027         | -            | 0.001       | 0.000         | 0.308     | 0.028    | 0.823     | 0.682                              | 0.296          | 0.861           | 0.601       | 0.967                            |
| Glucose                       | 0.210        | -0.033  | -0.168                | 0.017                           | -0.175            | 0.008       | -0.077        | 0.621**      | 1.000       | 0.973**       | -0.817**  | -0.297   | 0.119     | -0.116                             | -0.164         | 0.013           | -0.147      | -0.135                           |
|                               | 0.293        | 0.871   | 0.403                 | 0.931                           | 0.381             | 0.967       | 0.702         | 0.001        | -           | 0.000         | 0.000     | 0.132    | 0.555     | 0.563                              | 0.414          | 0.947           | 0.465       | 0.501                            |
| Fru + Glu                     | 0.108        | -0.044  | -0.149                | 0.003                           | -0.129            | 0.033       | -0.134        | 0.754**      | 0.973**     | 1.000         | -0.717**  | -0.298   | 0.087     | -0.053                             | -0.177         | 0.010           | -0.124      | -0.105                           |
|                               | 0.591        | 0.828   | 0.458                 | 0.989                           | 0.521             | 0.872       | 0.505         | 0.000        | 0.000       | -             | 0.000     | 0.131    | 0.667     | 0.792                              | 0.378          | 0.960           | 0.538       | 0.601                            |
| Fru / Glu                     | -0.338       | 0.013   | 0.250                 | -0.022                          | 0.313             | 0.017       | 0.006         | -0.204       | -0.817**    | -0.717**      | 1.000     | 0.113    | -0.064    | 0.346                              | 0.251          | 0.176           | 0.326       | 0.412*                           |
|                               | 0.085        | 0.948   | 0.209                 | 0.914                           | 0.111             | 0.933       | 0.975         | 0.308        | 0.000       | 0.000         | -         | 0.573    | 0.753     | 0.077                              | 0.206          | 0.379           | 0.097       | 0.033                            |
| HDE / P                       | -0.056       | 0.146   | 0.118                 | -0.021                          | 0.225             | 0.088       | 0.128         | -0.422*      | -0.297      | -0.298        | 0.113     | 1.000    | -0.728**  | 0.027                              | 0.015          | -0.087          | -0.417*     | -0.049                           |
|                               | 0.782        | 0.467   | 0.558                 | 0.917                           | 0.259             | 0.662       | 0.526         | 0.028        | 0.132       | 0.131         | 0.573     | -        | 0.000     | 0.892                              | 0.940          | 0.667           | 0.030       | 0.806                            |
| PG /10gr                      | -0.102       | -0.163  | -0.088                | -0.240                          | -0.173            | -0.026      | 0.357         | 0.045        | 0.119       | 0.087         | -0.064    | -0.728** | 1.000     | -0.102                             | 0.219          | -0.012          | 0.101       | -0.040                           |
|                               | 0.612        | 0.418   | 0.662                 | 0.228                           | 0.388             | 0.896       | 0.068         | 0.823        | 0.555       | 0.667         | 0.753     | 0.000    | -         | 0.613                              | 0.273          | 0.952           | 0.617       | 0.844                            |
| H <sub>2</sub> O <sub>2</sub> | -0.471*      | 0.282   | 0.346                 | -0.062                          | 0.381*            | -0.349      | 0.320         | 0.082        | -0.116      | -0.053        | 0.346     | 0.027    | -0.102    | 1.000                              | 0.501**        | 0.341           | 0.374       | 0.497                            |
|                               | 0.013        | 0.155   | 0.077                 | 0.757                           | 0.050             | 0.074       | 0.104         | 0.682        | 0.563       | 0.792         | 0.077     | 0.892    | 0.613     | -                                  | 0.008          | 0.081           | 0.055       | 0.008                            |

|         |                 |                 |                  |                |                  |                 |                  |                 |                 |                 |                 |                  |                 |                  |                |                  |                  |                  |
|---------|-----------------|-----------------|------------------|----------------|------------------|-----------------|------------------|-----------------|-----------------|-----------------|-----------------|------------------|-----------------|------------------|----------------|------------------|------------------|------------------|
| Protein | -0.306<br>0.120 | -0.329<br>0.094 | 0.556**<br>0.003 | 0.113<br>0.573 | 0.339<br>0.084   | -0.063<br>0.757 | 0.590**<br>0.001 | -0.209<br>0.296 | -0.164<br>0.414 | -0.177<br>0.378 | 0.251<br>0.206  | 0.015<br>0.940   | 0.219<br>0.273  | 0.501**<br>0.008 | 1.000<br>-     | 0.235<br>0.238   | 0.242<br>0.223   | 0.329<br>0.093   |
| TPC     | -0.202<br>0.312 | -0.085<br>0.673 | 0.592**<br>0.001 | 0.112<br>0.579 | 0.399<br>0.039   | -0.075<br>0.710 | 0.013<br>0.949   | -0.035<br>0.861 | 0.013<br>0.947  | 0.010<br>0.960  | 0.176<br>0.379  | -0.087<br>0.667  | -0.012<br>0.952 | 0.341<br>0.081   | 0.235<br>0.238 | 1.000<br>-       | 0.637**<br>0.000 | 0.684**<br>0.000 |
| DPPH    | -0.049<br>0.809 | -0.047<br>0.816 | 0.410*<br>0.034  | 0.255<br>0.199 | 0.271<br>0.172   | -0.149<br>0.459 | -0.047<br>0.816  | 0.105<br>0.601  | -0.147<br>0.465 | -0.124<br>0.538 | 0.326<br>0.097  | -0.417*<br>0.030 | 0.101<br>0.617  | 0.374<br>0.055   | 0.242<br>0.223 | 0.637**<br>0.000 | 1.000<br>-       | 0.684**<br>0.000 |
| FRAP    | 0.011<br>0.955  | 0.018<br>0.930  | 0.493**<br>0.009 | 0.204<br>0.308 | 0.547**<br>0.003 | -0.164<br>0.415 | 0.145<br>0.471   | -0.008<br>0.967 | -0.135<br>0.501 | -0.105<br>0.601 | 0.412*<br>0.033 | -0.049<br>0.806  | -0.040<br>0.844 | 0.497**<br>0.008 | 0.329<br>0.093 | 0.684**<br>0.000 | 0.684**<br>0.000 | 1.000<br>-       |

\*Correlation is statistically significant at the 0.05 level

\*\*Correlation is statistically significant at the 0.01 level
